# Supplementary material for: Totten Ice Shelf history over the past century interpreted from satellite imagery
Source: Copernicus journal article supplement (doi:10.5194/tc-19-4027-2025), 2025-09-25
Supplement: Supplementary file [file tc-19-4027-2025-supplement-title-page.pdf › tc-19-4027-2025-supplement-title-page.pdf]

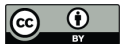

## *Supplement of*

# **Totten Ice Shelf history over the past century interpreted from satellite imagery**

**Bertie W. J. Miles et al.**

*Correspondence to:* Bertie W. J. Miles ([bertie.miles@ed.ac.uk](mailto:bertie.miles@ed.ac.uk))

- [tc-19-4027-2025-supplement-title-page.pdf](#)
- [egushere-2024-3964 Undulation\\_formation\\_animation.gif](#)
- [egusphere-2024-3964 Supplementary\\_Information.pdf](#)

The copyright of individual parts of the supplement might differ from the article licence.
